# Supplementary material for: Cosmogenic radionuclides reveal an extreme solar particle storm near a solar minimum 9125 years BP
Source: PubMed Central journal article supplement (PMC8752676; doi:10.1038/s41467-021-27891-4), 2022-01-11
Supplement: 41467_2021_27891_MOESM1_ESM.pdf [file 41467_2021_27891_MOESM1_ESM.pdf]

**Supplementary Information for ‘Cosmogenic radionuclides reveal an extreme solar particle storm near a solar minimum 9125 years BP’**

Chiara I. Paleari<sup>1\*</sup>, Florian Mekhaldi<sup>1,2</sup>, Florian Adolphi<sup>3</sup>, Marcus Christl<sup>4</sup>, Christof Vockenhuber<sup>4</sup>, Philip Gautschi<sup>4</sup>, Jürg Beer<sup>5</sup>, Nicolas Brehm<sup>4</sup>, Tobias Erhardt<sup>3,6</sup>, Hans-Arno Synal<sup>4</sup>, Lukas Wacker<sup>4</sup>, Frank Wilhelms<sup>3,7</sup> and Raimund Muscheler<sup>1</sup>

<sup>1</sup>Department of Geology – Quaternary Sciences, Lund University, 22362, Lund, Sweden

<sup>2</sup>British Antarctic Survey, Ice Dynamics and Paleoclimate, Cambridge, CB3 0ET, UK

<sup>3</sup> Alfred-Wegener-Institut Helmholtz-Zentrum für Polar- und Meeresforschung, 27570 Bremerhaven, Germany

<sup>4</sup>Laboratory of Ion Beam Physics, ETH Zürich, 8093 Zürich, Switzerland

<sup>5</sup>Department of Surface Waters, Swiss Federal Institute of Aquatic Science and Technology, 8600 Dübendorf, Switzerland

<sup>6</sup>Climate and Environmental Physics, Physics Institute and Oeschger Centre for Climate Change Research, University of Bern, 3012 Bern, Switzerland

<sup>7</sup>Department of Crystallography, Geoscience Centre, University of Göttingen, Göttingen, Germany

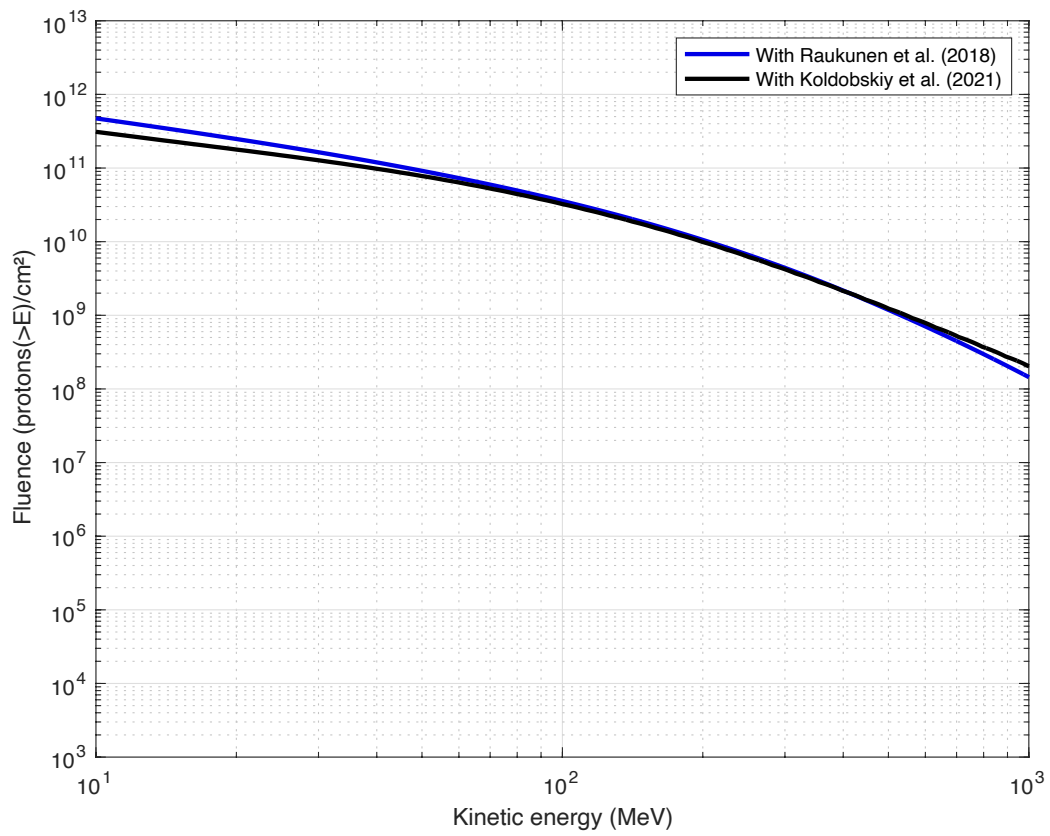

**Supplementary Figure 1.** Fluence spectra reconstructions for the 9125 years BP event using the spectra of modern GLEs from Koldobskiy et al. (2021)<sup>1</sup>, in black, and from Raukunen et al. (2018)<sup>2</sup>, in blue.

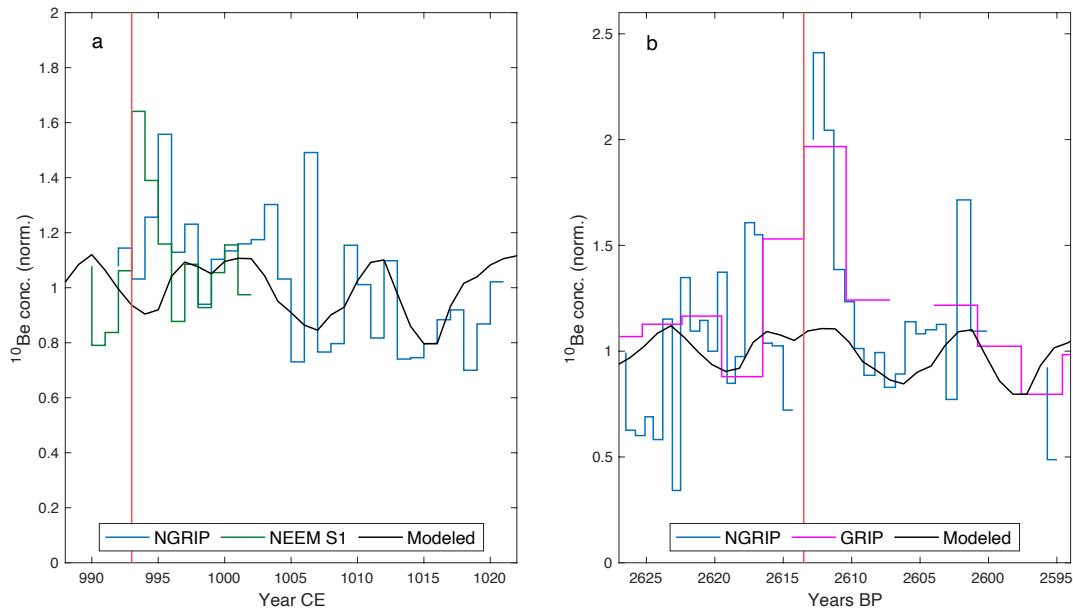

**Supplementary Figure 2.** Attempt at identifying the relationship between the solar 11-year cycle and the occurrence of the solar energetic particle events of 993/4 CE<sup>3</sup> and 2610 years BP<sup>4</sup>. Panel (a) shows the normalized  $^{10}\text{Be}$  records from NGRIP (blue) and NEEM S1 (green) around the 993/4 CE event compared to the normalized  $^{10}\text{Be}$  annual production rate modeled from neutron monitor data<sup>5</sup> (period 1966-1994 CE). Panel (b) shows the same comparison to the average  $^{10}\text{Be}$  data from ice cores from NGRIP (blue) and GRIP (magenta) for the 2610 years BP event with the normalized  $^{10}\text{Be}$  annual production rate modeled from neutron monitor data<sup>5</sup> (period 1961-1994). All records are normalized to their baseline (average  $^{10}\text{Be}$  concentration excluding the peak). The red line indicates the estimated onset of the event.

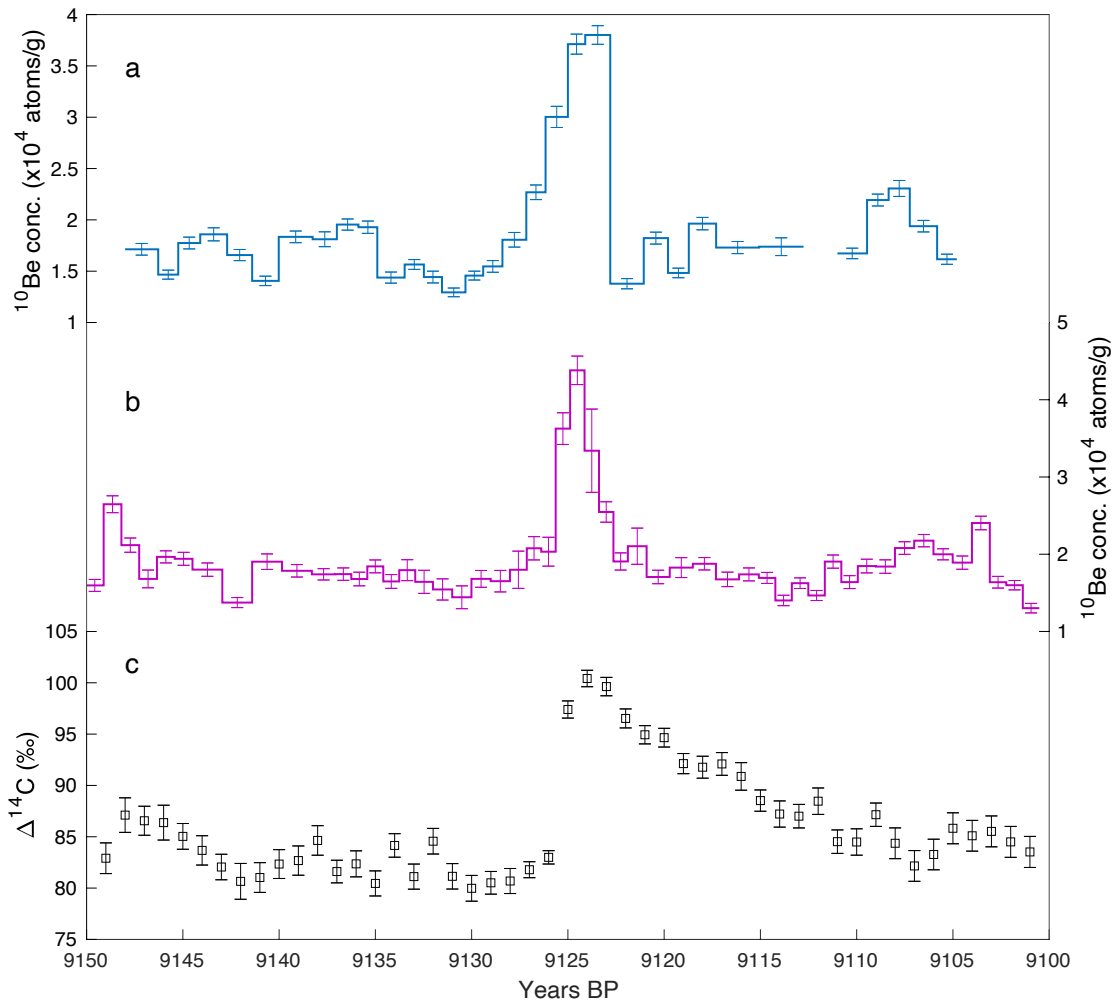

**Supplementary Figure 3.** Comparison between  $^{10}\text{Be}$  and radiocarbon records. The NGRIP  $^{10}\text{Be}$  record is shown in panel a), the EGRIP  $^{10}\text{Be}$  record in panel b). The error bar of each data point includes the measurement uncertainty. Panel c) shows the mean  $\Delta^{14}\text{C}$  record from Brehm et al. (2021)<sup>6</sup>. The records show synchronous  $^{10}\text{Be}$  and  $^{14}\text{C}$  peaks after an adjustment of the GICC05 timescale by -54 years ( $\pm 6$  years)<sup>7</sup>.

## References

1. Koldobskiy, S., Raukunen, O., Vainio, R., Kovaltsov, G. A. & Usoskin, I. New reconstruction of event-integrated spectra (spectral fluences) for major solar energetic particle events. *Astron. Astrophys.* **647**, 1–16 (2021).
2. Raukunen, O. *et al.* Two solar proton fluence models based on ground level enhancement observations. *J. Sp. Weather Sp. Clim.* **8**, 1–19 (2018).
3. Mekhaldi, F. *et al.* Multiradionuclide evidence for the solar origin of the cosmic-ray events of 774/5 and 993/4. *Nat. Commun.* **6**, 1–8 (2015).
4. O'Hare, P. *et al.* Multiradionuclide evidence for an extreme solar proton event around 2,610 B.P. (~660 BC). *Proc. Natl. Acad. Sci.* **116**, 201815725 (2019).
5. Mekhaldi, F., Adolphi, F., Herbst, K. & Muscheler, R. The Signal of Solar Storms Embedded in Cosmogenic Radionuclides: Detectability and Uncertainties. *J. Geophys. Res. Sp. Phys.* **126**, (2021).
6. Brehm, N. *et al.* Tree-rings reveal two strong solar proton events in 7176 and 5259. *Nat. Commun.* (2021). Preprint at doi:10.21203/rs.3.rs-753272/v1
7. Adolphi, F. & Muscheler, R. Synchronizing the Greenland ice core and radiocarbon timescales over the Holocene-Bayesian wiggle-matching of cosmogenic radionuclide records. *Clim. Past* **12**, 15–30 (2016).
